# Supplementary material for: Nonselective Bottlenecks Control the Divergence and Diversification of Phase-Variable Bacterial Populations
Source: PubMed Central journal article supplement (PMC5380846; doi:10.1128/mbio.02311-16), 2017-04-04

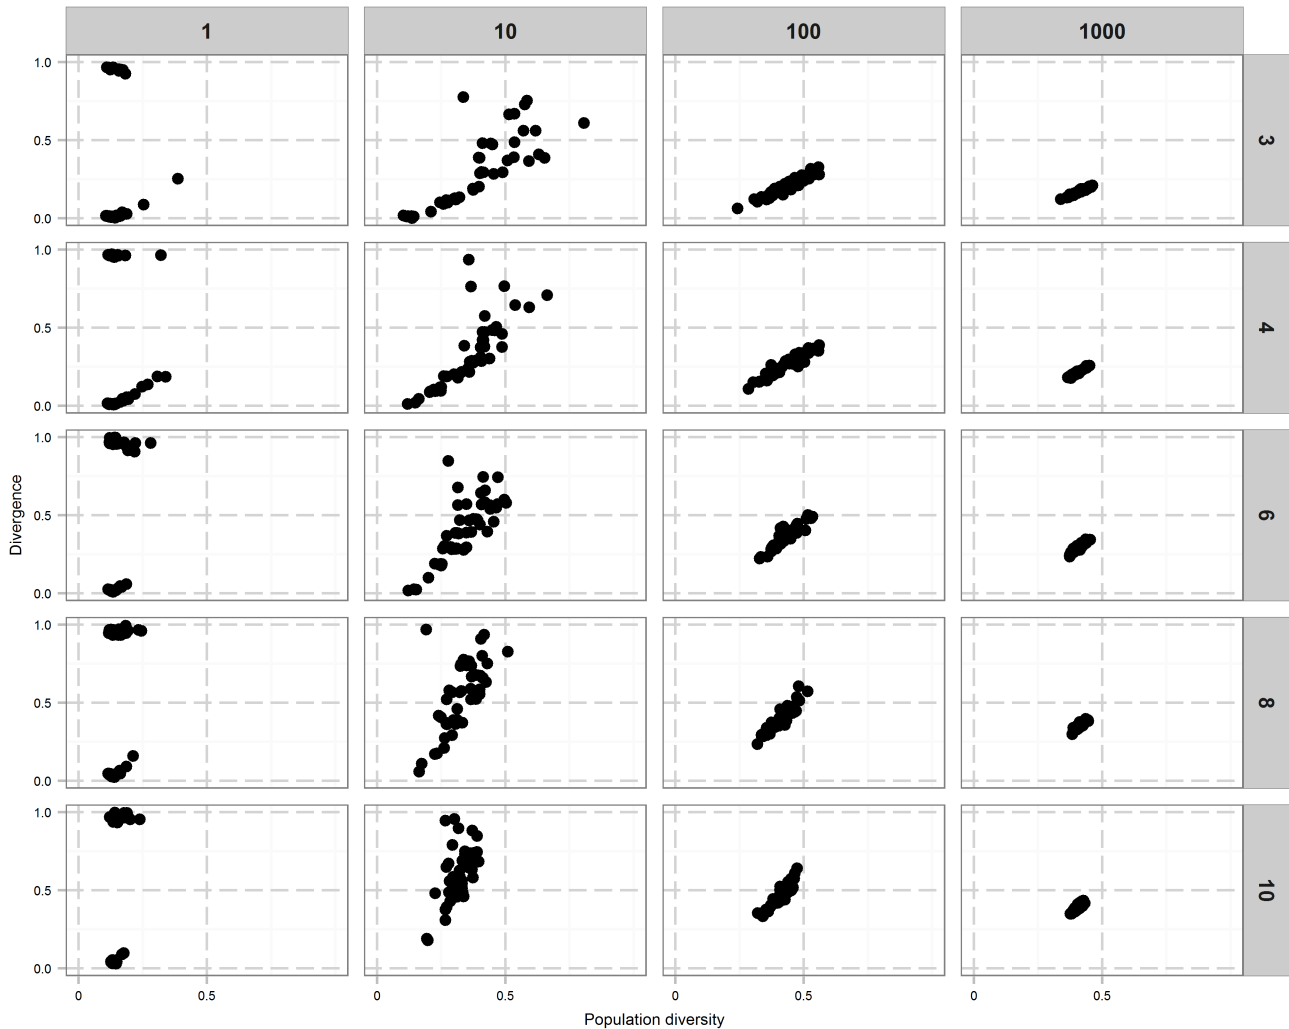

Supplement: mbo002173265sf3.pdf [file mbo002173265sf3.pdf]
